# Supplementary material
Source: PubMed Central journal article supplement (PMC10269548)

# Distributional Balance for "prop.score"

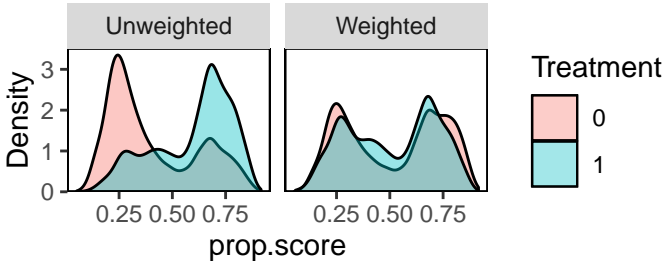

# Covariate Balance

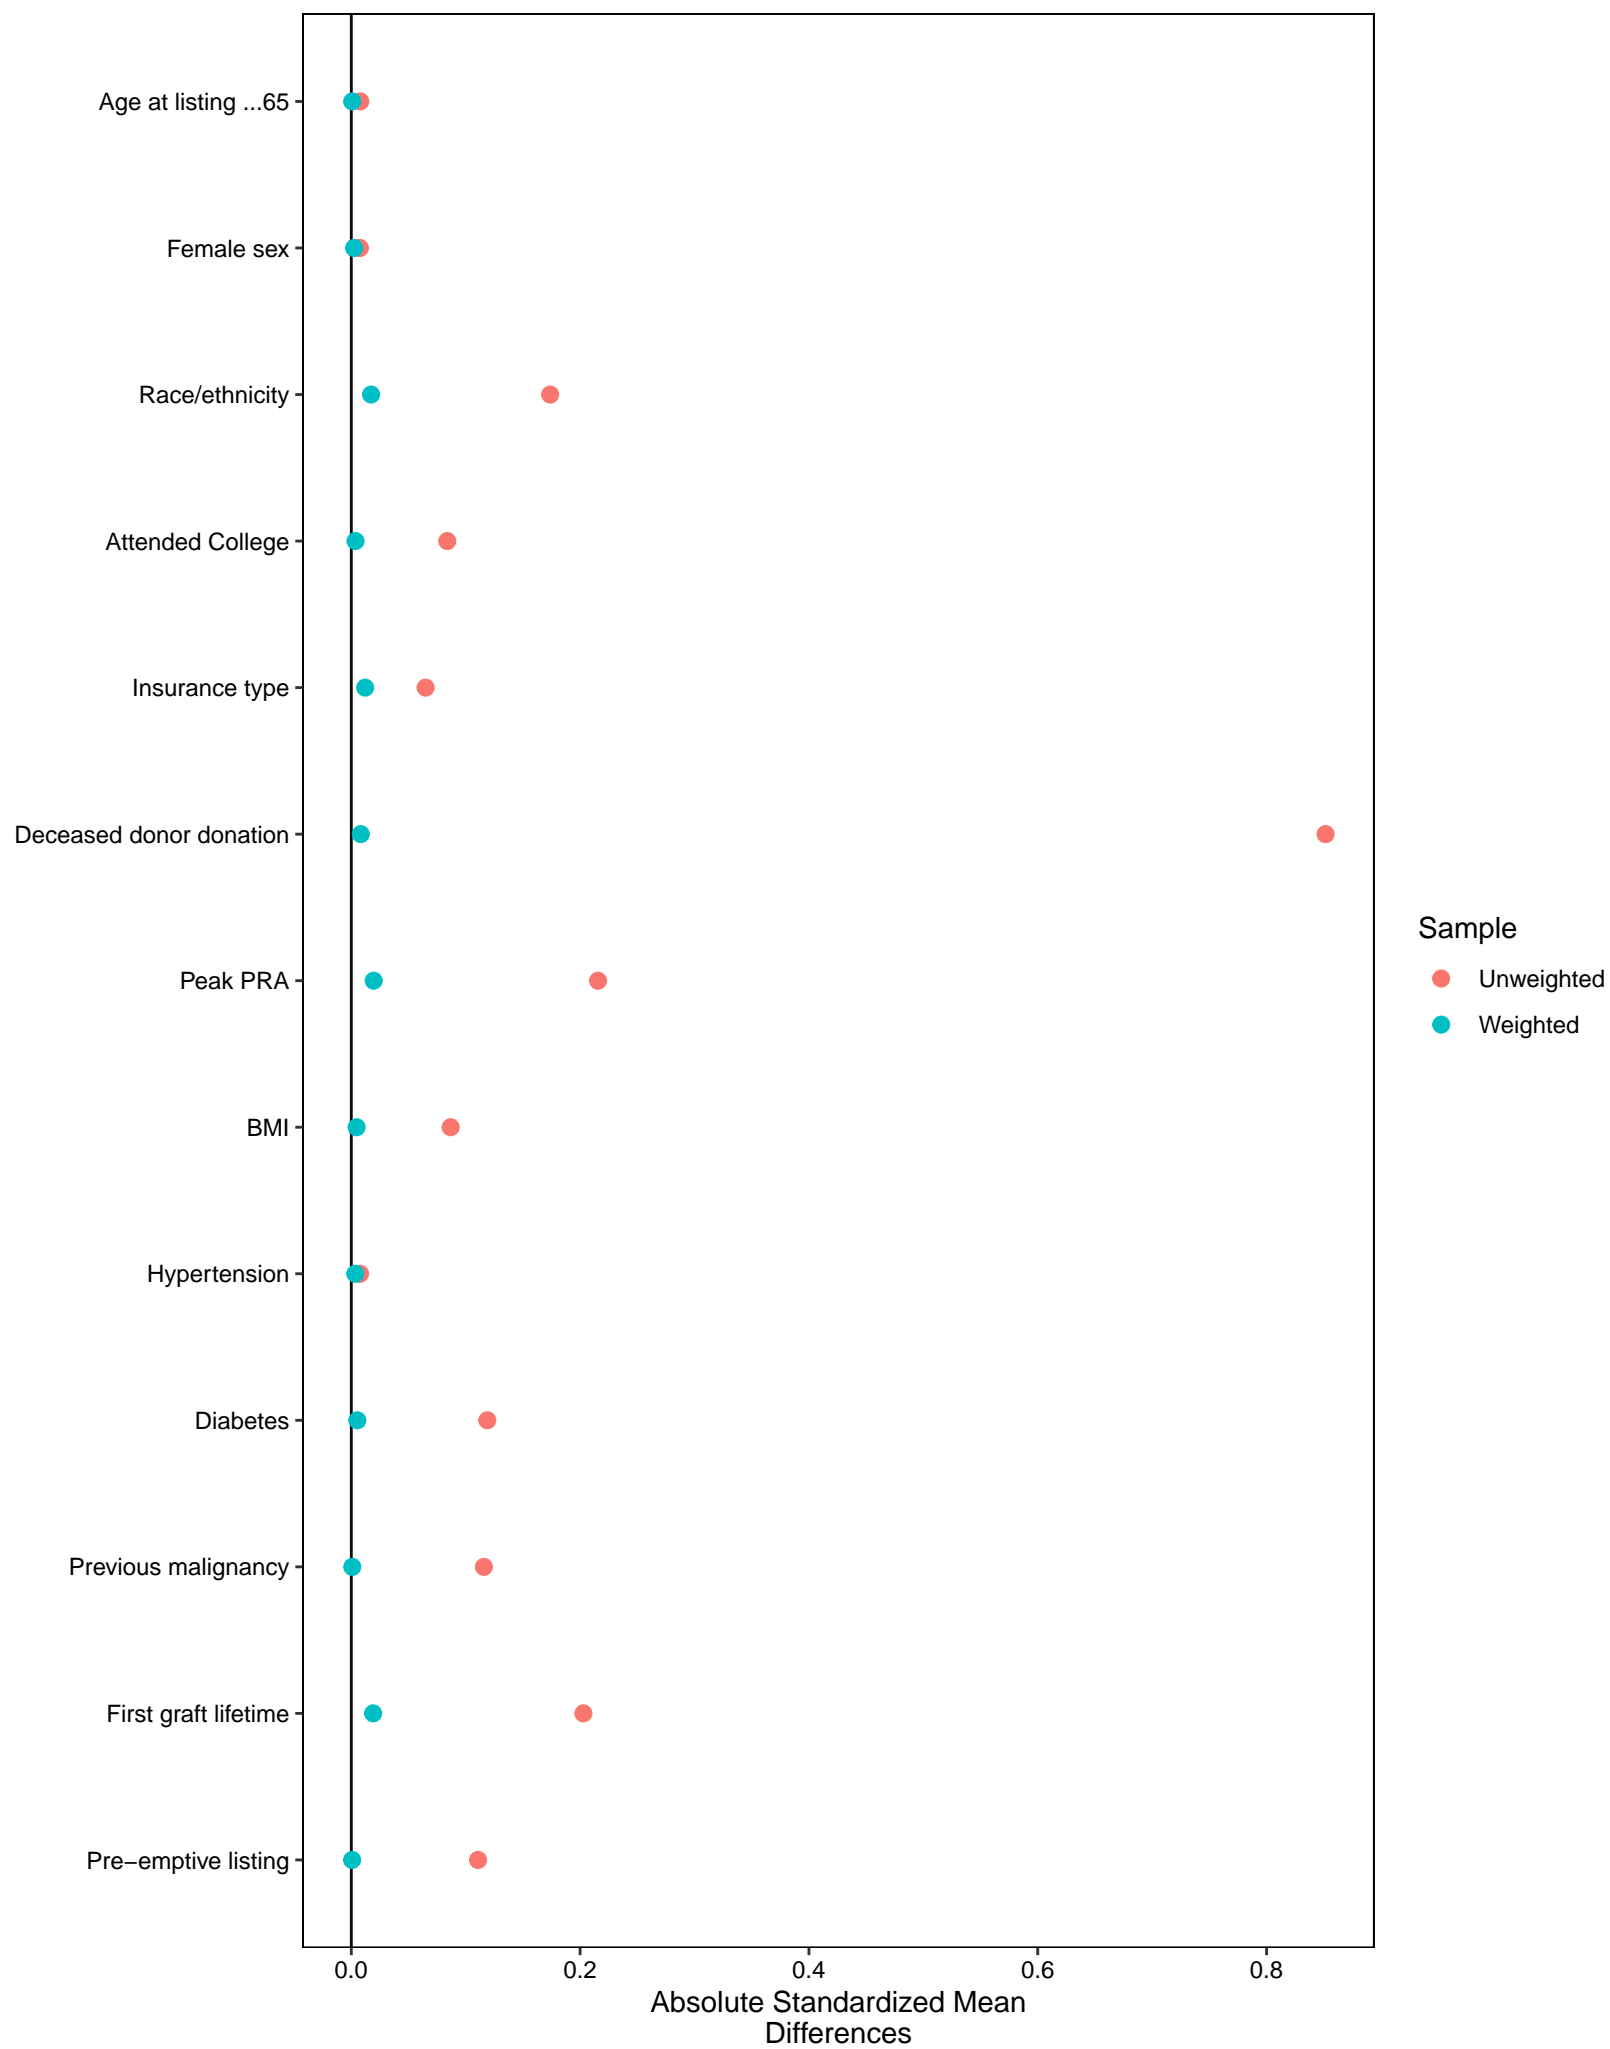

Supplement: NIHMS1902580-supplement-1.pdf [file NIHMS1902580-supplement-1.pdf]
